# Supplementary material for: Thermal-induced growth of RuO2nanorods from a binary Ru–Ti oxide composite and alteration in supercapacitive characteristics
Source: Royal Society of Chemistry journal article supplement (doi:10.1039/c2ta01111e), 2012-11-30
Supplement: c2ta01111e.pdf [file c2ta01111e.pdf]

## Supporting Information

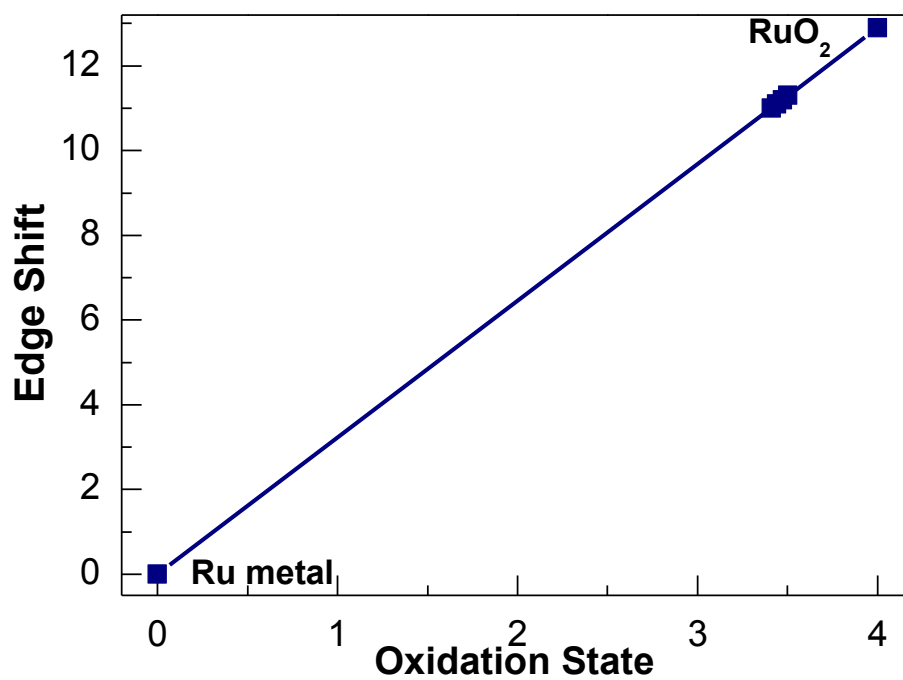

**Figure S1†** Distribution of Ru oxidation state for various binary Ru-Ti oxides, Ru metal and RuO<sub>2</sub> are used as reference samples.

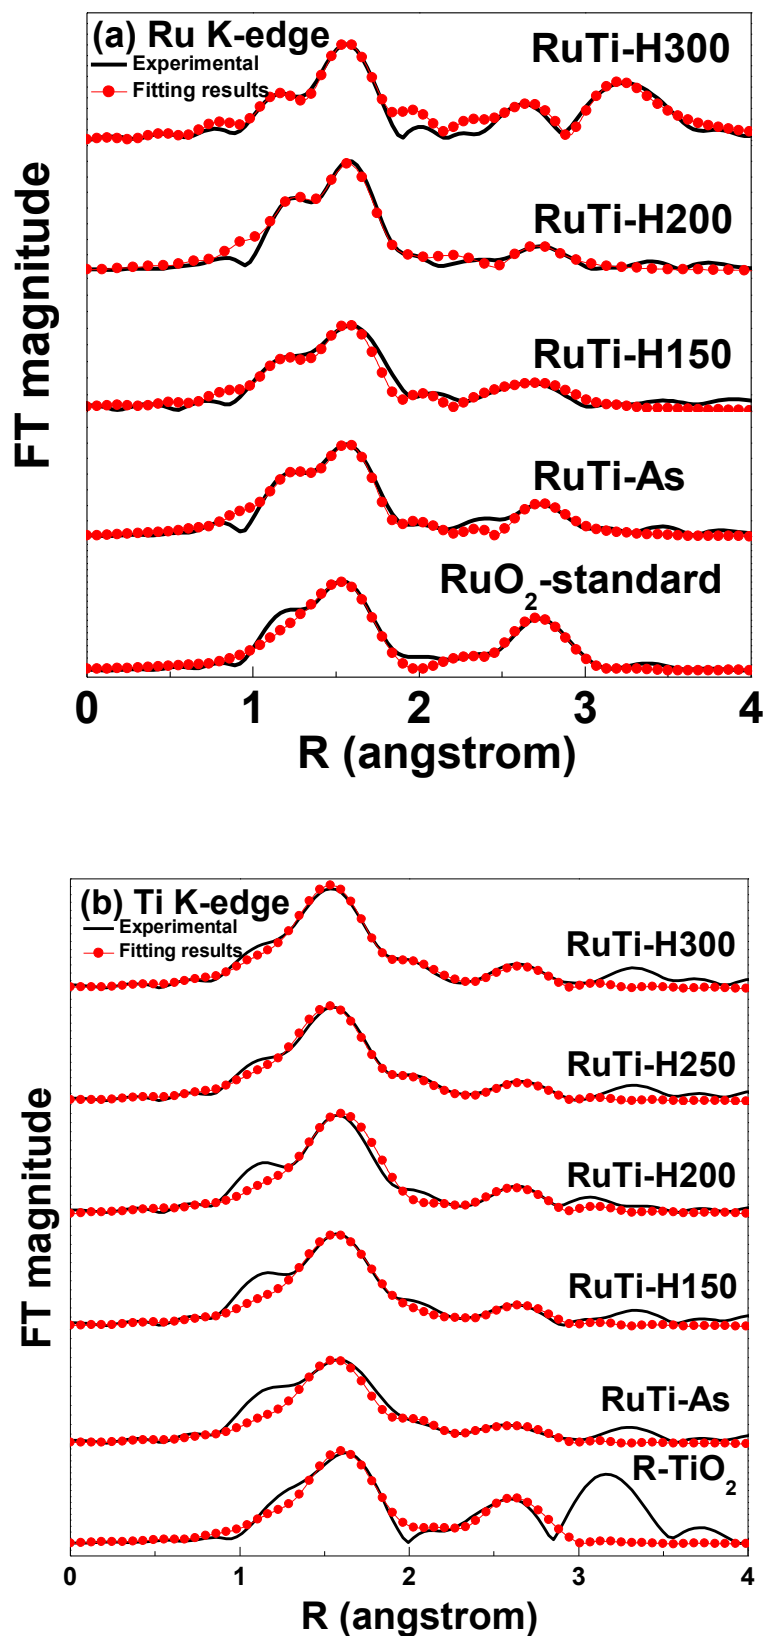

**Figure S2†** Fitting results of (a) Ru and (b) Ti K-edge EXAFS spectra for the standard RuO<sub>2</sub>, rutile TiO<sub>2</sub> and various binary Ru-Ti oxides.

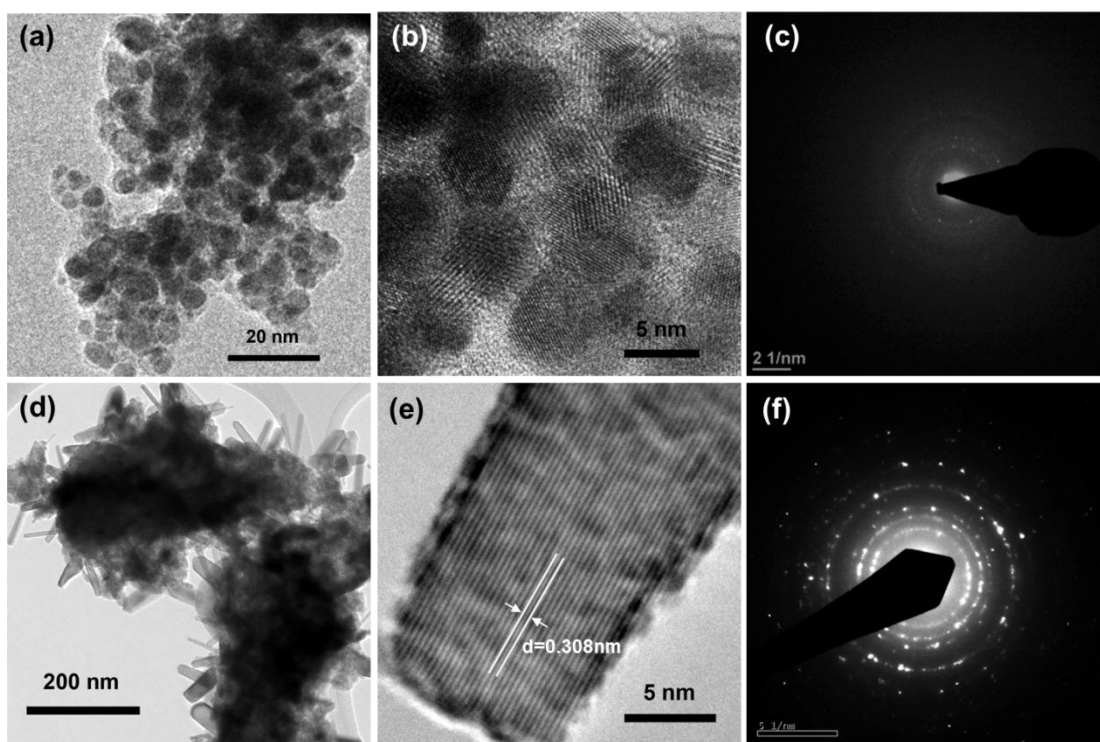

**Figure S3†** HR-TEM morphologies and the corresponding electron diffraction patterns for (a-c) RuTi-200 and (d-f) RuTi-300. The clear lattice fringe and diffraction point of RuTi-H300 indicates an increased crystallinity characteristic and the formation of long-range order structure.

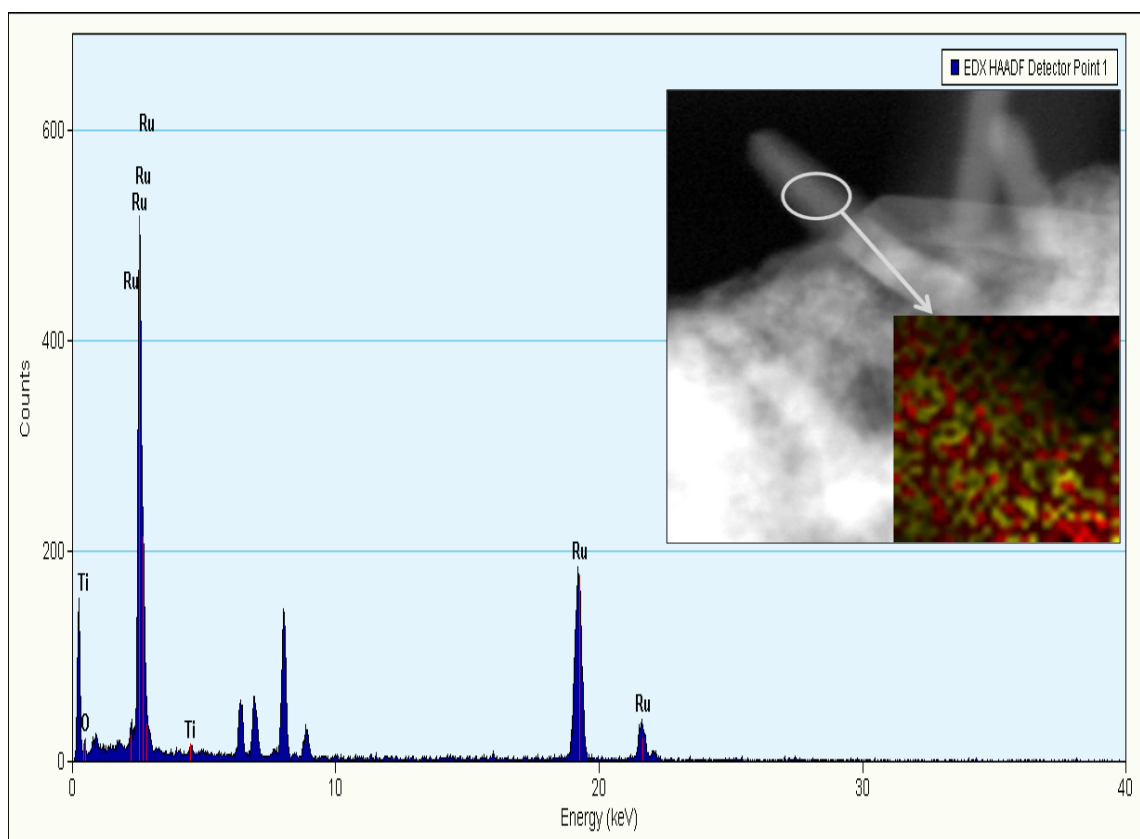

**Figure S4†** HR-TEM image measured at the high angle annular dark field (HAADF) mode and the corresponding EDS mapping results of RuTi-300. The red and yellow spots shown in the mapping profile stand for Ru and Ti elements, respectively. It can be clearly seen that a small amount of Ti element exists inside the RuO<sub>2</sub> nanorods. The calculated Ru/Ti atomic ratio is approximately 96.2/3.8 (The intensity of Ti is lower than that of Ru).

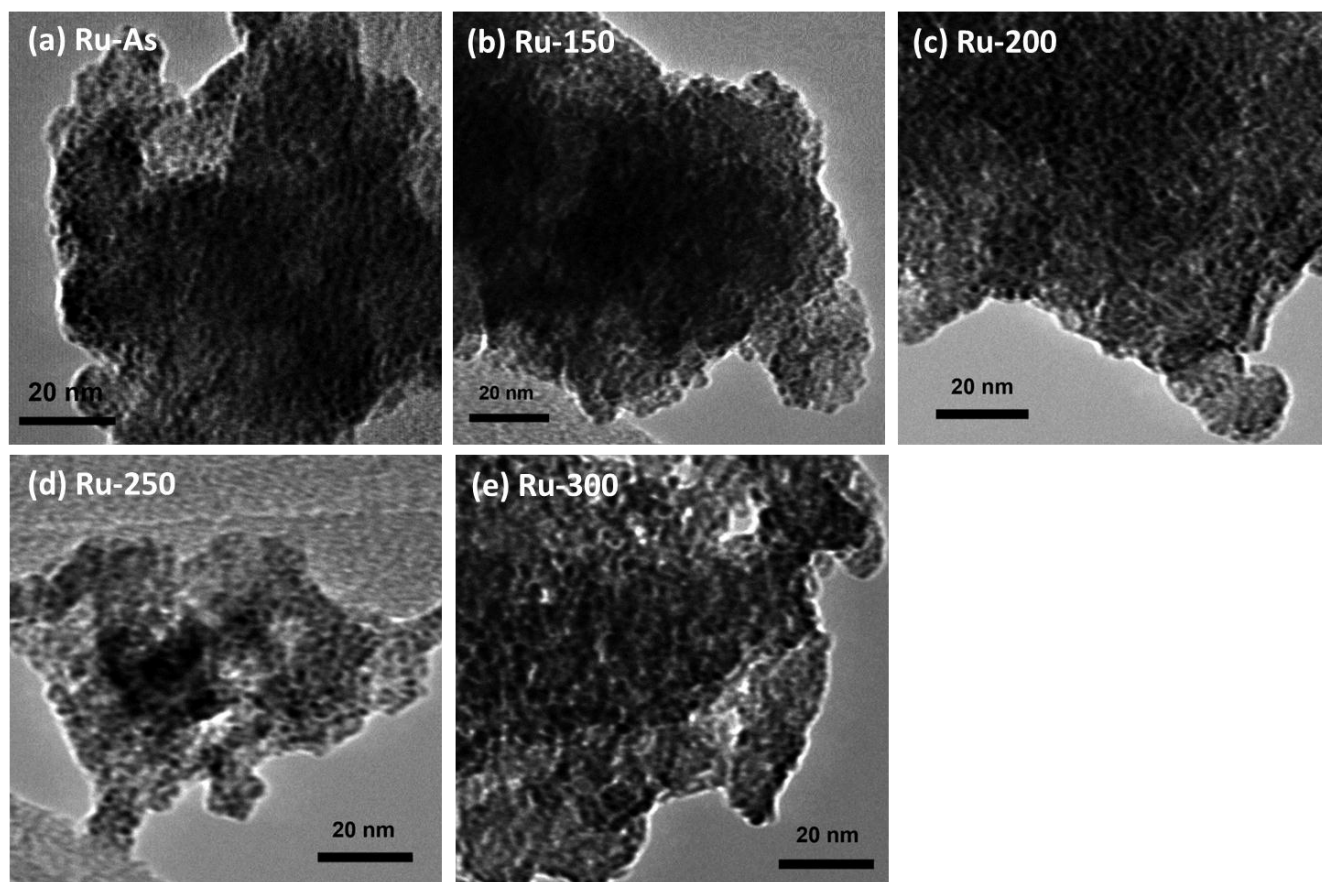

**Figure S5†** TEM morphologies for (a) Ru-as, (b) Ru-150, (c) Ru-200, (d) Ru-250, (e) Ru-300, and (f) Ru-300 samples.

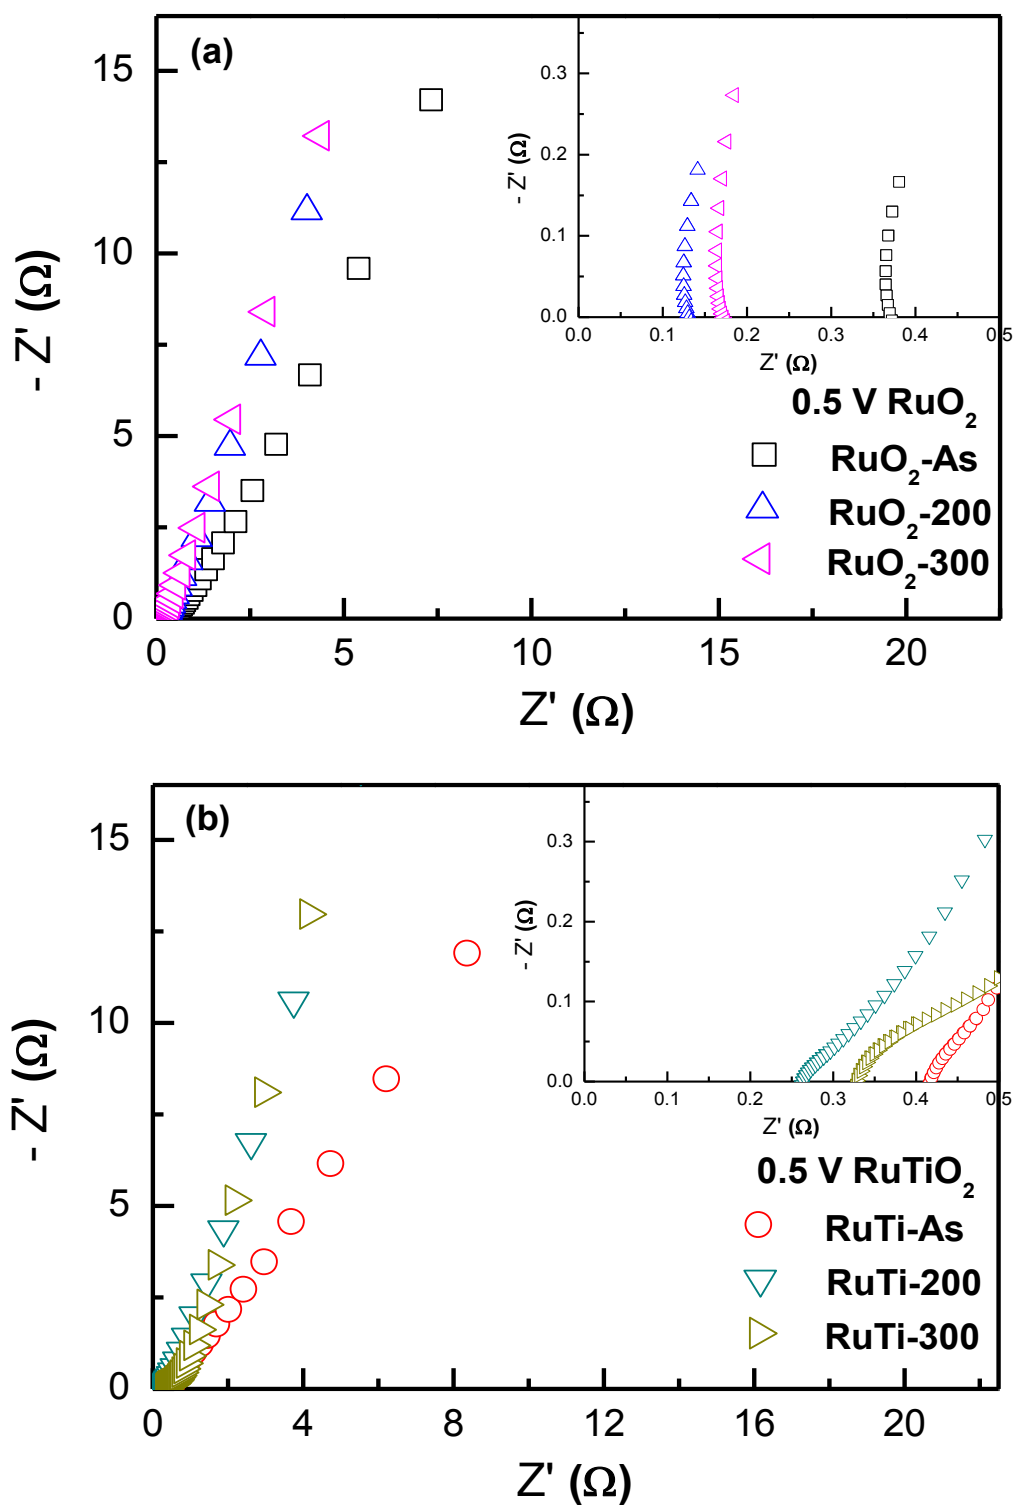

**Figure S6†** Electrochemical impedance spectra of (a) RuO<sub>2</sub> and (b) RuTiO<sub>2</sub> nanocomposites annealed at various temperatures. EIS results were measured at 0.5 V in 0.5 M H<sub>2</sub>SO<sub>4</sub>. Inset shows the spectra in the high-frequency region.

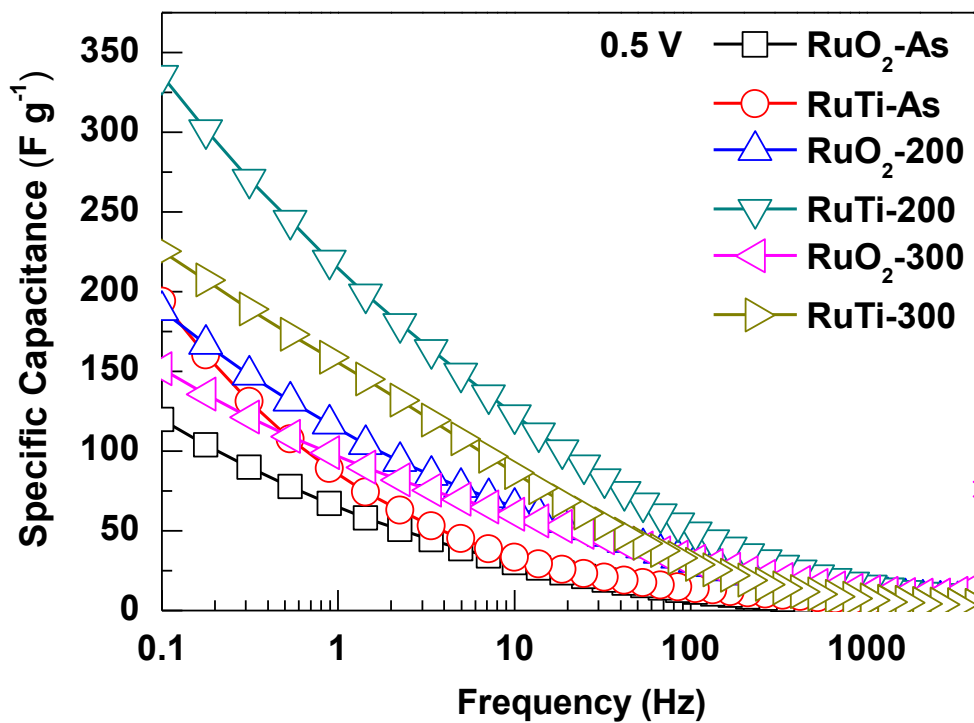

**Figure S7†** Frequency dependence of specific capacitance for RuO<sub>2</sub> and (Ru-Ti)O<sub>2</sub> electrode annealed at various temperatures ( $0.5 \pm 0.02 \text{ mg cm}^{-2}$ ). The results were measured at 0.5 V and the electrolyte for the electrochemical measurements is 0.5 M H<sub>2</sub>SO<sub>4</sub>.
